# Supplementary material for: What is the impact of user affect on motor learning in virtual environments after stroke? A scoping review
Source: Springer Nature journal article supplement (doi:10.1186/s12984-019-0546-4), 2019-06-27
Supplement: MOESM1 [file 16862666]

MEDLINE search strategy

(Date of last search: Friday, October 13, 2017 4:16:49 PM).

| #  | Query                                                                                                                                                                                                                                                                                                                                                                                                                                                                                   | Limiters/<br>Expanders                                                                 | Results |
|----|-----------------------------------------------------------------------------------------------------------------------------------------------------------------------------------------------------------------------------------------------------------------------------------------------------------------------------------------------------------------------------------------------------------------------------------------------------------------------------------------|----------------------------------------------------------------------------------------|---------|
| S4 | S2 AND S3                                                                                                                                                                                                                                                                                                                                                                                                                                                                               | Limiters - Age<br>Related: All Adult:<br>19+ years<br>Search modes -<br>Boolean/Phrase | 220     |
| S3 | ( (MH "Stroke") OR "stroke" OR (MH "Stroke<br>Rehabilitation") OR (MH "Cerebrovascular<br>Disorders") OR "poststroke" OR<br>"cerebrovascular disorder" ) NOT ( (MH<br>"Cognition") OR (MH "Cognition Disorders")<br>OR (MH "Cognitive Aging") OR (MH "Cognitive<br>Dysfunction") OR (MH "Perceptual Disorders")<br>OR "neglect" OR (MH "Anxiety") OR "anxiety"<br>OR (MH "Anxiety Disorders") ) )                                                                                       | Search modes -<br>Boolean/Phrase                                                       | 268.176 |
| S2 | S1 NOT ( (MH "Electric Stimulation") OR<br>"functional electrical stimulation" OR "fmri" OR<br>"transcranial magnetic stimulation" OR (MH<br>"Transcutaneous Electric Nerve Stimulation")<br>OR (MH "Transcranial Direct Current<br>Stimulation") OR (MH "Deep Brain<br>Stimulation") ) NOT ( (MH "Robotics") OR (MH<br>"Exoskeleton Device") OR (MH "Robotic<br>Surgical Procedures") OR robots OR robot<br>assisted therapy OR robot* OR robot assisted<br>training OR exoskeleton* ) | Search modes -<br>Boolean/Phrase                                                       | 12.076  |
| S1 | ( (MH "Virtual Reality Exposure Therapy") OR<br>"virtual reality" OR "augmented reality" OR<br>"mixed reality" OR "virtual rehabilitation" OR<br>"virtual therapy" OR "virtual environment" OR<br>"virtual training" ) OR ( (MH "Video Games")<br>OR (MH "Games, Recreational") ) OR "active<br>video gam*" OR "interactive video gam*" OR<br>"serious gam*" OR "exergam*" OR "xbox<br>kinect" OR "sony play*" OR "nintendo wii*" )                                                     | Search modes -<br>Boolean/Phrase                                                       | 13.248  |
