# Supplementary material for: What is the impact of user affect on motor learning in virtual environments after stroke? A scoping review
Source: J Neuroeng Rehabil. 2019 Jun 27;16:79. doi: 10.1186/s12984-019-0546-4 (PMC6598261; doi:10.1186/s12984-019-0546-4)
Supplement: Supplementary file 3 — List of studies included in summative content analysis (n = 50). (XLSX 63 kb) [file 12984_2019_546_MOESM3_ESM.xlsx]

## Sheet: Tabelle1
Authors	Year	Title	Upper Extremity/ Lower Extremity	Study Design	Measurement	Construct related Statistical Interference Tests	Statistical Inference Tests (Construct related to Motor Learning Outcome)	Correlation between Constructs Indicated?	Rationale given in any of the 50 studies	Explanation given in any of the fifty studies	Relationship proposed
Eng, Kynan, Siekierka, Ewa, Pyk, Pawel, Chevrier, Edith, Hauser, Yves, Cameirao, Monica, Holper, Lisa, Hägni, Karin, Zimmerli, Lukas, Duff, Armin, Schuster, Corina, Bassetti, Claudio, Verschure, Paul and Kiper, Daniel	2007	Interactive visuo-motor therapy system for stroke rehabilitation	Upper Extremity	Pilot	Self-designed Q´s (Enjoyment), Qual (Enjoyment)	/	No	No	No	No	No
Flynn, Sheryl, Palma, Phyllis and Bender, Anneke	2007	Feasibility of using the Sony PlayStation 2 gaming platform for an individual poststroke: a case report	Full body	Pilot	BDI, Qual (Motivation, Enjoyment)	/	No	No	Yes	Yes	Yes
Broeren, J., Claesson, L., Goude, D., Rydmark, M. and Sunnerhagen, K. S.	2008	Virtual rehabilitation in an activity centre for community-dwelling persons with stroke. The possibilities of 3-dimensional computer games	Upper Extremity	Pre-post	Qual (Enjoyment)	No; qualitive summary	No	No	Yes	No	No
Szturm, Tony, Peters, James F., Otto, Chris, Kapadia, Naaz and Desai, Ankur	2008	Task-specific rehabilitation of finger-hand function using interactive computer gaming	Upper Extremity	Case series	Self-designed Q´s (Motivation, Enjoyment)	No; qualitive summary	No	No	Yes	No	No
Crosbie, J. H., McNeill, M. D. J., Burke, J. and McDonough, S.	2009	Utilising technology for rehabilitation of the upper limb following stroke: the Ulster experience	Upper Extremity	Overview of Work	ITQ (Presence, Immersion), Qual (Enjoyment)	No; only descriptively	No	No	Yes	No	Yes
Bower, Kelly J., Clark, Ross A., McGinley, Jennifer L., Martin, Clarissa L. and Miller, Kimberly J.	2010	Clinical feasibility of the Nintendo Wii™ for balance training post-stroke: a phase II randomized controlled trial in an inpatient setting	Lower Extremity	RCT	Self-designed Q´s (Enjoyment)	Yes; Independent t-tests, Mann-Whitney U tests or Chi-square tests	No	No	No	No	No
Yong Joo, Loh, Soon Yin, Tjan, Xu, Donald, Thia, Ernest, Pei Fen, Chia, Kuah, Christopher Wee Keong and Kong, Keng-He	2010	A feasibility study using interactive commercial off-the-shelf computer gaming in upper limb rehabilitation in patients after stroke	Upper Extremity	Pilot	Self-designed Q´s (Enjoyment), Qual (Enjoyment)	No; only descriptively	No	No	Yes	No	Yes
Brown, Riki, Burstin, Arie and Sugarman, Heidi	2011	Use of the Wii Fit system for the treatment of balance problems in the elderly: a feasibility study	Lower Extremity	Pilot	SFQ (Presence, Immersion, Enjoyment)	No; only descriptively	No	No	Yes	No	Yes
da Silva Cameirão, Mónica, Bermúdez I Badia, Sergi, Duarte, Esther and Verschure, Paul F. M. J.	2011	Virtual reality based rehabilitation speeds up functional recovery of the upper extremities after stroke: a randomized controlled pilot study in the acute phase of stroke using the rehabilitation gaming system	Upper Extremity	Pilot-RCT	Self-designed Q´s (Enjoyment)	No; only descriptively	No	No	No	No	Yes
Lewis, Gwyn N., Woods, Claire, Rosie, Juliet A. and McPherson, Kathryn M.	2011	Virtual reality games for rehabilitation of people with stroke: perspectives from the users	Upper Extremity	Pilot	Self-designed Q´s (Engagement, Enjoyment), Qual (Engagement, Enjoyment)	No; only descriptively	No	No	Yes	Yes	Yes
Proffitt, Rachel M., Alankus, Gazihan, Kelleher, Caitlin L. and Engsberg, Jack R.	2011	Use of computer games as an intervention for stroke	Upper Extremity	Case report	Qual (Enjoyment)	/	No	No	Yes	No	Yes
Schuck, Sarah O., Whetstone, Amy, Hill, Valerie, Levine, Peter and Page, Stephen J.	2011	Game-based, portable, upper extremity rehabilitation in chronic stroke	Upper Extremity	Pilot	Self-designed Q´s (Motivation, Enjoyment)	/	No	No	Yes	Yes	Yes
Ballester, Belén Rubio, i Badia, Sergi Bermúdez and Verschure, Paul FMJ	2012	Including social interaction in stroke VR-based motor rehabilitation enhances performance: a pilot study	Upper Extremity	Pilot-RCT	IMI (Motivation, Enjoyment)	/	No	No	Yes	Yes	Yes
Crosbie, J. H., Lennon, S., McGoldrick, M. C., McNeill, M. D. J. and McDonough, S. M.	2012	Virtual reality in the rehabilitation of the arm after hemiplegic stroke: a randomized controlled pilot study	Upper Extremity	Pilot-RCT	Self-designed Q´s (Enjoyment)	/	No	No	No	No	Yes
Hale, Leigh A., Satherley, Jessica A., McMillan, Nicole J., Milosavljevic, Stephan, Hijmans, Juha M. and King, Marcus J.	2012	Participant perceptions of use of CyWee Z as adjunct to rehabilitation of upper-limb function following stroke	Upper Extremity	Pilot	Qual (Enjoyment)	/	No	No	No	No	Yes
King, Marcus, Hijmans, Juha M., Sampson, Michael, Satherley, Jessica and Hale, Leigh	2012	Home-based stroke rehabilitation using computer gaming	Upper Extremity	Pilot	IMI (Motivation, Enjoyment); Qual (Engagement); Diaries of adherence (Engagement)	/	No	No	Yes	Yes	Yes
Levin, M. F., Snir, O., Liebermann, D. G., Weingarden, H. and Weiss, P. L.	2012	Virtual reality versus conventional treatment of reaching ability in chronic stroke: clinical feasibility study	Upper Extremity	Pilot	Qual (Motivation, Enjoyment)	No; qualitive summary	No	No	No	Yes	Yes
Reinthal, Ann, Szirony, Kathy, Clark, Cindy, Swiers, Jeffrey, Kellicker, Michelle and Linder, Susan	2012	ENGAGE: Guided Activity-Based Gaming in Neurorehabilitation after Stroke: A Pilot Study	Upper Extremity	Pilot	IMI (Motivation, Enjoyment)	Yes; Wilcoxon Signed Ranks Test	No	No	Yes	No	Yes
Sampson, Michael, Shau, Yio-Wha and King, Marcus James	2012	Bilateral upper limb trainer with virtual reality for post-stroke rehabilitation: case series report	Upper Extremity	Case series	IMI (Motivation, Enjoyment)	/	No	No	Yes	Yes	Yes
Shiri, Shimon, Feintuch, Uri, Lorber-Haddad, Adi, Moreh, Elior, Twito, Dvora, Tuchner-Arieli, Maya and Meiner, Zeev	2012	Novel virtual reality system integrating online self-face viewing and mirror visual feedback for stroke rehabilitation: rationale and feasibility	Upper Extremity	Pilot	Qual (Enjoyment)	No; qualitive summary	No	No	No	No	No
Deutsch, Judith E., Myslinski, Mary Jane, Kafri, Michal, Ranky, Richard, Sivak, Mark, Mavroidis, Constantinos and Lewis, Jeffrey A.	2013	Feasibility of virtual reality augmented cycling for health promotion of people poststroke	Lower Extremity	Pilot	PQ (Presence, Immersion, Engagement); Traning time (Engagement)	No; only descriptively	No	No	Yes	Yes	Yes
Neil, A., Ens, S., Pelletier, R., Jarus, T. and Rand, D.	2013	Sony PlayStation EyeToy elicits higher levels of movement than the Nintendo Wii: implications for stroke rehabilitation	Upper Extremity	RCT	SFQ (Presence, Immersion, Enjoyment)	Yes; MANOVA	No	No	No	No	No
Lloréns, R., Colomer-Font, C., Alcañiz, M. and Noé-Sebastián, E.	2013	BioTrak virtual reality system: effectiveness and satisfaction analysis for balance rehabilitation in patients with brain injury	Lower Extremity	Pre-post	SFQ (Presence, Immersion)	No; only descriptively	No	No	Yes	No	Yes
Shin, Joon-Ho, Ryu, Hokyoung and Jang, Seong Ho	2014	A task-specific interactive game-based virtual reality rehabilitation system for patients with stroke: a usability test and two clinical experiments	Upper Extremity	Mixed Method	Flow-Questionnaire (Motivation, Engagement, Enjoyment)	Yes; one-sample t-test	No	No	Yes	Yes	Yes
Subramanian, S. K., Lourenco, C. B., Chilingaryan, G., Sveistrup, H. and Levin, M. F.	2013	Arm motor recovery using a virtual reality intervention in chronic stroke: randomized control trial	Upper Extremity	RCT	IMI-TEQ (Motivation, Enjoyment)	Yes; Chi-square test	No	No	Yes	Yes	Yes
Bower, Kelly J., Clark, Ross A., McGinley, Jennifer L., Martin, Clarissa L. and Miller, Kimberly J.	2014	Clinical feasibility of the Nintendo Wii™ for balance training post-stroke: a phase II randomized controlled trial in an inpatient setting	Lower Extremity; Upper Extremity	RCT	Self-designed Q´s (Enjoyment)	/	No	No	No	No	No
Fan, S. C., Su, F. C., Chen, S. S., Hou, W. H., Sun, J. S., Chen, K. H., Lin, W. H. and Hsu, S. H.	2014	Improved intrinsic motivation and muscle activation patterns in reaching task using virtual reality training for stroke rehabilitation: a pilot randomized control trial	Upper Extremity; Lower Extremity	Pilot-RCT	IMI (Motivation, Enjoyment); Qual (Motivation)	Yes; non-parametric Kruskal-Wallis test, Chi-square test, Dunn's pairwise comparison	No	No	Yes	Yes	Yes
Friedman, Nizan, Chan, Vicky, Reinkensmeyer, Andrea N., Beroukhim, Ariel, Zambrano, Gregory J., Bachman, Mark and Reinkensmeyer, David J.	2014	Retraining and assessing hand movement after stroke using the MusicGlove: comparison with conventional hand therapy and isometric grip training	Upper Extremity	RCT	IMI (Motivation, Enjoyment)	Yes; Student's t-test (paired), rmANOVA, Friedman test, Wilcoxon signed-rank test	No	No	Yes	Yes	Yes
Hung, Jen-Wen, Chou, Chiung-Xia, Hsieh, Yen-Wei, Wu, Wen-Chi, Yu, Min-Yuan, Chen, Po-Chih, Chang, Hsueh-Fen and Ding, Shan-Er	2014	Randomized comparison trial of balance training by using exergaming and conventional weight-shift therapy in patients with chronic stroke	Lower Extremity (balance)	RCT	PACES (enjoyment)	Yes; independent t-test, Chi-square test	No	No	Yes	Yes	Yes
Jordan, Kimberlee, Sampson, Michael and King, Marcus	2014	Gravity-supported exercise with computer gaming improves arm function in chronic stroke	Upper Extremity	Pre-post (ABA)	IMI (Motivation, Enjoyment)	No; only descriptively	No	No	Yes	Yes	Yes
Kottink, A. I. R., Prange, G. B., Krabben, T., Rietman, J. S. and Buurke, J. H.	2014	Gaming and conventional exercises for improvement of arm function after stroke: a randomized controlled pilot study	Upper Extremity	Pilot	IMI (Motivation, Enjoyment)	Yes; Mann Whitney U Test	No	No	Yes	Yes	Yes
Subramaniam, Savitha, Wan-Ying Hui-Chan, Christina and Bhatt, Tanvi	2014	A Cognitive-Balance Control Training Paradigm Using Wii Fit to Reduce Fall Risk in Chronic Stroke Survivors	Lower Extremity (balance)	Pre-post	IMI (Motivation)	Yes; confidence intervals	No	No	Yes	Yes	Yes
Yin, Chan Wai, Sien, Ng Yee, Ying, Low Ai, Chung, Stephanie Fook-Chong Man and Tan May Leng, Dawn	2014	Virtual reality for upper extremity rehabilitation in early stroke: a pilot randomized controlled trial	Upper Extremity	Pilot-RCT	Self-designed Q´s (Enjoyment)	/	No	No	Yes	No	Yes
Bower, Kelly J., Louie, Julie, Landesrocha, Yoseph, Seedy, Paul, Gorelik, Alexandra and Bernhardt, Julie	2015	Clinical feasibility of interactive motion-controlled games for stroke rehabilitation	Upper Extremity	Pilot-RCT	Self-designed Q´s (Motivation, Enjoyment)	Yes; Kruskall-Wallis test	No	No	Yes	Yes	Yes
Brokaw, Elizabeth B., Eckel, Emily and Brewer, Bambi R.	2015	Usability evaluation of a kinematics focused Kinect therapy program for individuals with stroke	Upper Extremity	Pilot	Self-designed Q´s (Motivation)	/	No	No	Yes	Yes	Yes
Chen, Mei-Hsiang, Huang, Lan-Ling, Lee, Chang-Franw, Hsieh, Ching-Lin, Lin, Yu-Chao, Liu, Hsiuchih, Chen, Ming- I. and Lu, Wen-Shian	2015	A controlled pilot trial of two commercial video games for rehabilitation of arm function after stroke	Upper Extremity	Pilot	Self-designed Q´s (Motivation, Enjoyment)	Yes; Kruskal-Wallis test	No	No	No	Yes	Yes
Llorens, R., Gil-Gomez, J. A., Alcaniz, M., Colomer, C. and Noe, E.	2015	Improvement in balance using a virtual reality-based stepping exercise: a randomized controlled trial involving individuals with chronic stroke [with consumer summary]	Lower Extremity	RCT	SFQ (Presence, Immersion, Enjoyment)	No; only descriptively	No	No	Yes	No	Yes
Lloréns, Roberto, Noé, Enrique, Colomer, Carolina and Alcañiz, Mariano	2015	Effectiveness, usability, and cost-benefit of a virtual reality-based telerehabilitation program for balance recovery after stroke: a randomized controlled trial	Lower Extremity	RCT	IMI (Motivation, Enjoyment)	Yes; independent sample t-test	No	No	Yes	No	Yes
Samuel, Geoffrey S., Choo, Min, Chan, Wai Yin, Kok, Stanley and Ng, Yee Sien	2015	The use of virtual reality-based therapy to augment poststroke upper limb recovery	Upper Extremity	Case report	Qual (Engagement)	/	No	No	No	No	No
Song, G. B. and Park, E. C.	2015	Effect of virtual reality games on stroke patients' balance, gait, depression, and interpersonal relationships	Lower Extremity (balance)	RCT	BDI (Motivation)	/	No	No	Yes	Yes	Yes
Wingham, Jenny, Adie, Katja, Turner, David, Schofield, Christine and Pritchard, Colin	2015	Participant and caregiver experience of the Nintendo Wii Sports™ after stroke: qualitative study of the trial of Wii™ in stroke (TWIST)	Upper Extremity	Interviews	Qual (Motivation, Enjoyment)	/	No	No	No	No	No
Gorsic, Maja and Novak, Domen	2016	Design and pilot evaluation of competitive and cooperative exercise games for arm rehabilitation at home	Upper Extremity	Pilot	IMI (Motivation, Enjoyment); Comparitive game experience qeustionnaire (Motivation)	/	No	No	Yes	Yes	Yes
Lee Minyoung, Sung-Bom, Pyun, Jinjoo, Chung, Jungjin, Kim, Seon-Deok, Eun and BumChul, Yoon	2016	A Further Step to Develop Patient-Friendly Implementation Strategies for Virtual Reality-Based Rehabilitation in Patients With Acute Stroke	Upper Extremity	Mixed Method	Self-designed Q´s (Enjoyment)	No; only descriptively	No	No	Yes	Yes	Yes
Paquin, Kate, Crawley, Jamie, Harris, Jocelyn E. and Horton, Sean	2016	Survivors of chronic stroke – participant evaluations of commercial gaming for rehabilitation	Upper Extremity	Interviews	Qual (Motivation, Engagement, Enjoyment)	/	No	No	Yes	Yes	Yes
Tsekleves, Emmanuel, Paraskevopoulos, Ioannis Theoklitos, Warland, Alyson and Kilbride, Cherry	2016	Development and preliminary evaluation of a novel low cost VR-based upper limb stroke rehabilitation platform using Wii technology	Upper Extremity	Pilot	Qual (Motivation, Engagement, Enjoyment)	/	No	No	Yes	Yes	Yes
Wittmann, Frieder, Held, Jeremia P., Lambercy, Olivier, Starkey, Michelle L., Curt, Armin, Höver, Raphael, Gassert, Roger, Luft, Andreas R. and Gonzenbach, Roman R.	2016	Self-directed arm therapy at home after stroke with a sensor-based virtual reality training system	Upper Extremity	Pilot	Time System Used (Motivation), Qual (Motivation)	/	No	No	Yes	Yes	No
Hoermann, Simon, Ferreira dos Santos, Luara, Morkisch, Nadine, Jettkowski, Katrin, Sillis, Moran, Devan, Hemakumar, Kanagasabai, Parimala S., Schmidt, Henning, Krüger, Jörg, Dohle, Christian, Regenbrecht, Holger, Hale, Leigh and Cutfield, Nicholas J.	2017	Computerised mirror therapy with Augmented Reflection Technology for early stroke rehabilitation: clinical feasibility and integration as an adjunct therapy	Upper Extremity	Pilot	Self-designed Q´s (Motivation, Engagement)	/	No	No	Yes	No	No
Lehmann, Isabelle, Baer, Gillian and Schuster-Amft, Corina	2017	Experience of an upper limb training program with a non-immersive virtual reality system in patients after stroke: a qualitative study	Upper Extremity	Interviews	Qual (Motivation, Enjoyment)	/	No	No	Yes	Yes	Yes
TÜRkbey, Tuba Aliskan, Kutlay, Sehim and GÖK, Haydar	2017	CLINICAL FEASIBILITY OF XBOX KINECT™ TRAINING FOR STROKE REHABILITATION: A SINGLE-BLIND RANDOMIZED CONTROLLED PILOT STUDY	Upper Extremity	Pilot-RCT	Qual (Motivation, Enjoyment)	No; qualitive summary	No	No	Yes	Yes	Yes
Stockley, Rachel C O’Connor, Deborah A Smith, Phil Moss, Sylvia Allsop, Lizzie Edge, Wendy	2017	A mixed methods small pilot study to describe the effects of upper limb training using a virtual reality gaming system in people with chronic stroke	Upper Extremity	Pilot	Qual (Motivation, Enjoyment)	/	No	No	Yes	Yes	No
